# Supplementary material
Source: ML conference proceedings conference paper supplement (https://openreview.net/forum?id=HbIxwfMJ4W)
Supplement: supplementary_material [file attachment]

# Supplementary Material for Learning Spectral-Decomposed Tokens for Domain Generalized Semantic Segmentation

ACM MM 2024 Anonymous Submission

## ACM Reference Format:

ACM MM 2024 Anonymous Submission. 2018. Supplementary Material for Learning Spectral-Decomposed Tokens for Domain Generalized Semantic Segmentation. In *Proceedings of ACM Conference (Conference'17)*. ACM, New York, NY, USA, 3 pages. <https://doi.org/XXXXXXX.XXXXXXX>

This supplementary material provides more visual segmentation results on unseen target domains. Specifically, Fig. 1 and Fig. 2 show more results under  $C \rightarrow B$ ,  $M$ ,  $G$ ,  $S$  and  $C \rightarrow ACDC$  setting. On both settings, the segmentation results show that the proposed SET shows better pixel-wise prediction than the compared DGSS methods, especially in terms of the completeness of objects.

## REFERENCES

- [1] Sungha Choi, Sanghun Jung, Huiwon Yun, Joanne T Kim, Seungryong Kim, and Jaegul Choo. 2021. Robustnet: Improving Domain Generalization in Urban-Scene Segmentation via Instance Selective Whitening. In *Proceedings of the IEEE/CVF Conference on Computer Vision and Pattern Recognition*. 11580–11590.
- [2] Wei Huang, Chang Chen, Yong Li, Jiacheng Li, Cheng Li, Fenglong Song, Youliang Yan, and Zhiwei Xiong. 2023. Style Projected Clustering for Domain Generalized Semantic Segmentation. In *Proceedings of the IEEE/CVF Conference on Computer Vision and Pattern Recognition*. 3061–3071.
- [3] Suhyeon Lee, Hongje Seong, Seongwon Lee, and Euntai Kim. 2022. WildNet: Learning Domain Generalized Semantic Segmentation from the Wild. In *Proceedings of the IEEE/CVF Conference on Computer Vision and Pattern Recognition*. 9936–9946.
- [4] Duo Peng, Yinjie Lei, Munawar Hayat, Yulan Guo, and Wen Li. 2022. Semantic-Aware Domain Generalized Segmentation. In *Proceedings of the IEEE/CVF Conference on Computer Vision and Pattern Recognition*. 2594–2605.
- [5] Zhixiang Wei, Lin Chen, Yi Jin, Xiaoxiao Ma, Tianle Liu, Pengyang Lin, Ben Wang, Huaian Chen, and Jinjin Zheng. 2024. Stronger, Fewer, & Superior: Harnessing Vision Foundation Models for Domain Generalized Semantic Segmentation. In *Proceedings of the IEEE/CVF Conference on Computer Vision and Pattern Recognition*.

Permission to make digital or hard copies of all or part of this work for personal or classroom use is granted without fee provided that copies are not made or distributed for profit or commercial advantage and that copies bear this notice and the full citation on the first page. Copyrights for components of this work owned by others than the author(s) must be honored. Abstracting with credit is permitted. To copy otherwise, or republish, to post on servers or to redistribute to lists, requires prior specific permission and/or a fee. Request permissions from [permissions@acm.org](mailto:permissions@acm.org).  
*Conference'17, July 2017, Washington, DC, USA*  
© 2018 Copyright held by the owner/author(s). Publication rights licensed to ACM.  
ACM ISBN 978-1-4503-XXXX-X/18/06...\$15.00  
<https://doi.org/XXXXXXX.XXXXXXX>

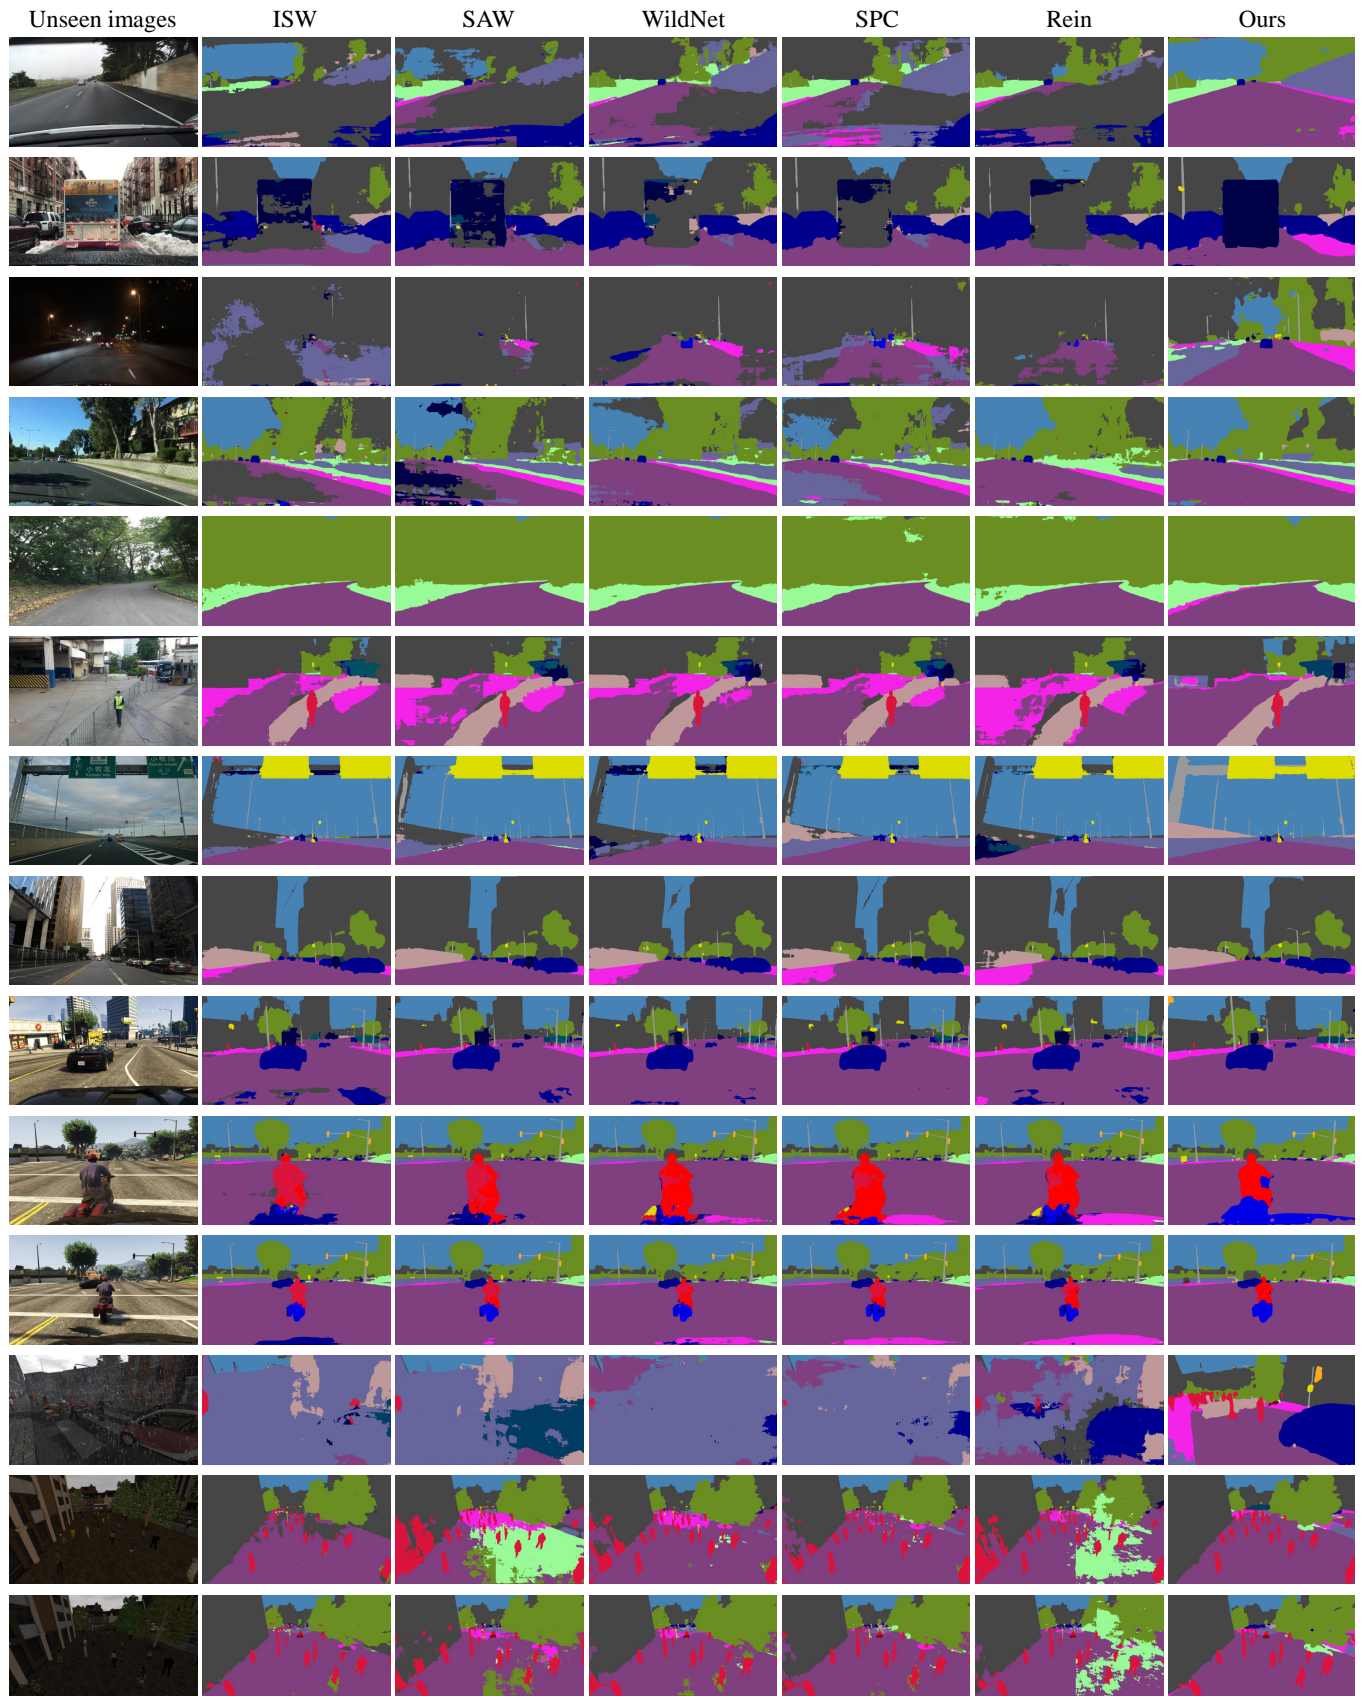

Figure 1: Visual segmentation results on unseen target domains under the C  $\rightarrow$  B, M, G, S setting. The proposed SET is compared with ISW [1], SAW [4], WildNet [3], SPC [2] and Rein [5].

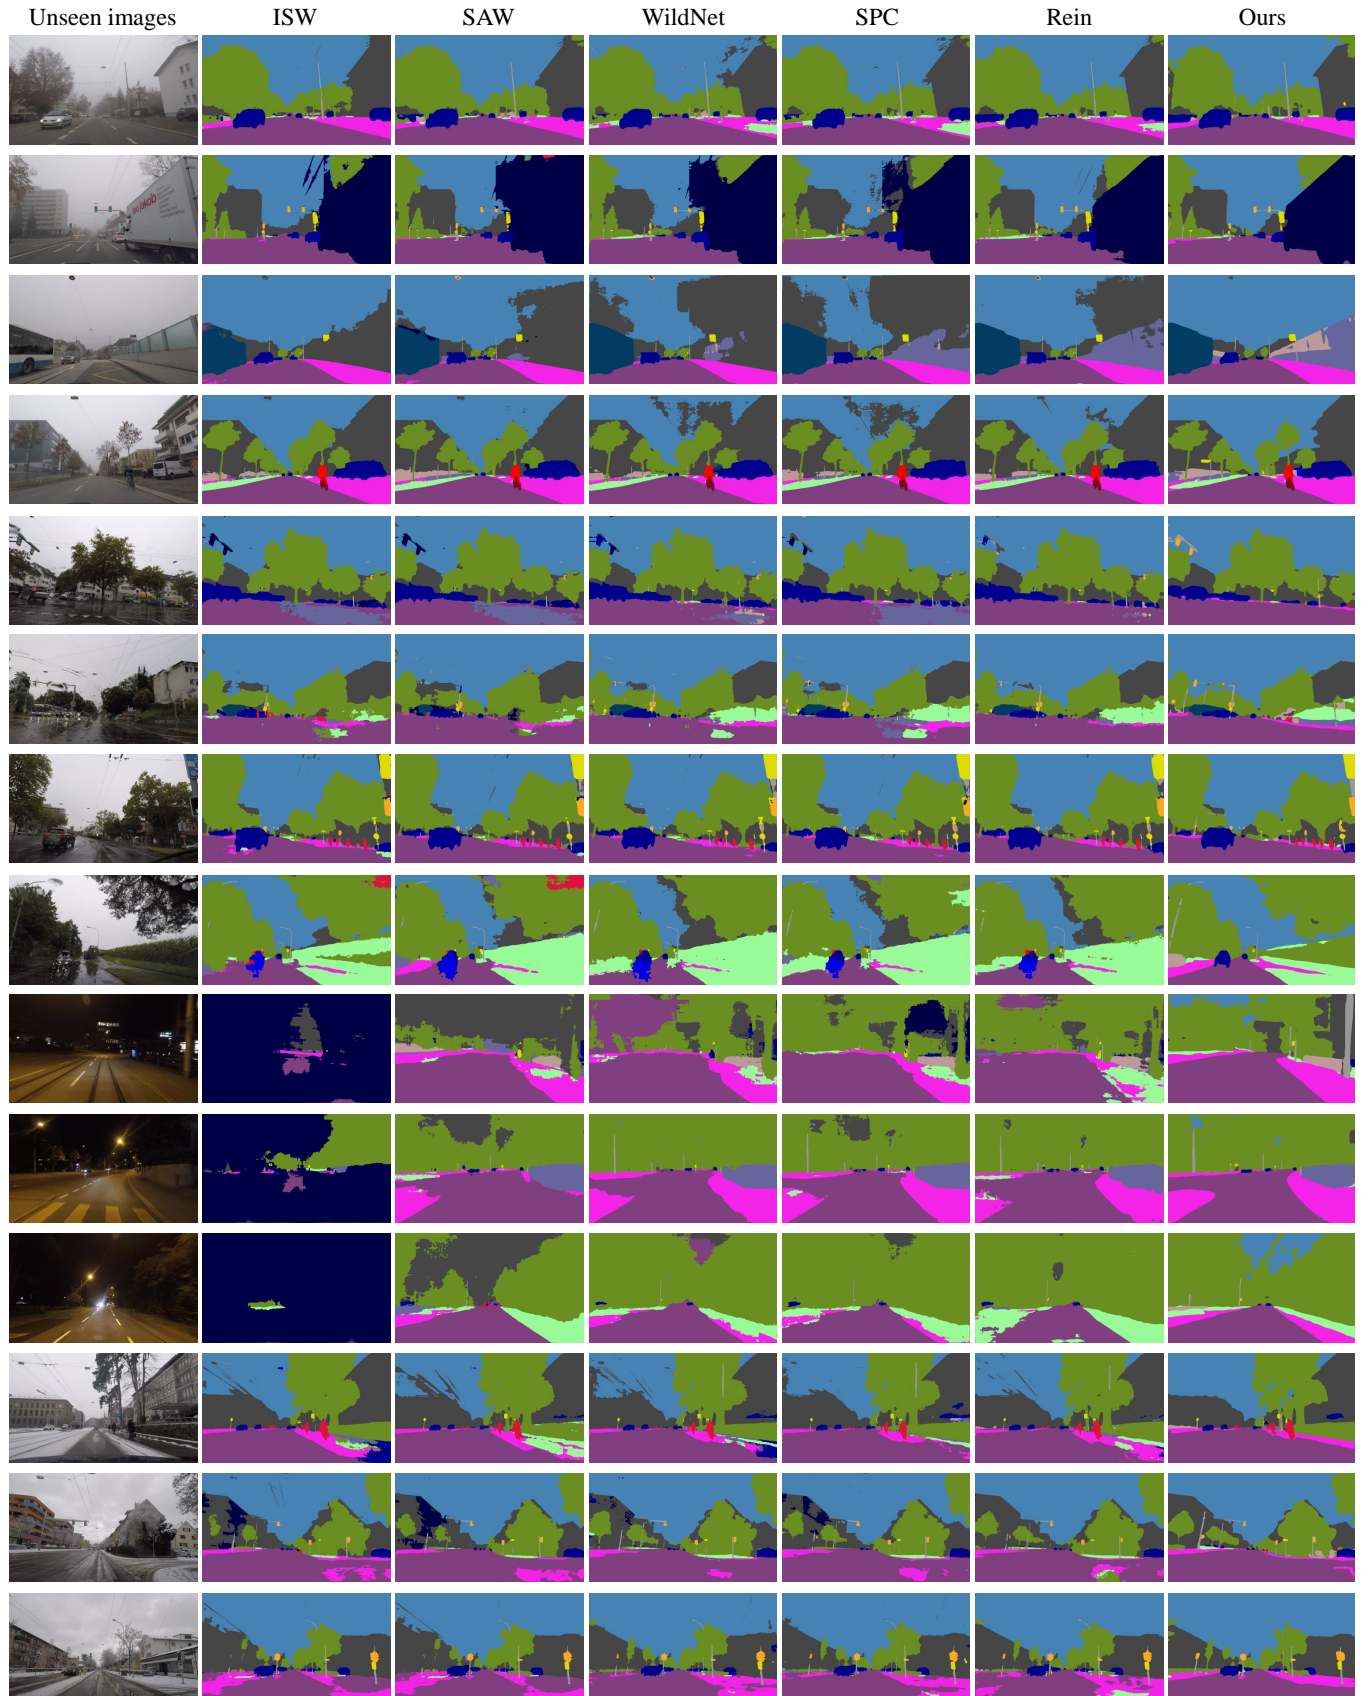

Figure 2: Visual segmentation results on unseen target domains under the  $C \rightarrow ACDC$  setting. The proposed SET is compared with ISW [1], SAW [4], WildNet [3], SPC [2] and Rein [5].
